# Supplementary material for: Mechanism by Which PF-3758309, a Pan Isoform Inhibitor of p21-Activated Kinases, Blocks Reactivation of HIV-1 Latency
Source: Biomolecules. 2023 Jan 4;13(1):100. doi: 10.3390/biom13010100 (PMC9855626; doi:10.3390/biom13010100)
Supplement: Supplementary file 1 [file biomolecules-13-00100-s001.zip › biomolecules-1954290-supplementary.pdf]

## **SUPPLEMENTARY DATA**

### **Mechanism by which PF-3758309, a Pan Isoform Inhibitor of p21-Activated Kinases, Blocks Reactivation of HIV-1 Latency**

**Benni Vargas<sup>a</sup>, James Boslett<sup>b</sup>, Nathan A. Yates<sup>b, c</sup>, Nicolas Sluis-Cremer<sup>a</sup>**

<sup>a</sup> Division of Infectious Diseases, Department of Medicine, University of Pittsburgh School of Medicine, Pittsburgh, PA, 15261

<sup>b</sup> Department of Cell Biology, University of Pittsburgh School of Medicine, Pittsburgh, PA, 15261

<sup>c</sup> Department of Chemistry, University of Pittsburgh School of Medicine, Pittsburgh, PA, 15261

**Supplementary Table 1: Primer sequences used for qPCR analysis of PAK isoform expression**

| <b>Primer</b> | <b>Primer Sequence (5' → 3')</b> |
|---------------|----------------------------------|
| PAK1 Fw       | TATGATTGGAGCCGGCAGC              |
| PAK1 Rv       | CTGAAGGGAGAGAAATCTCTGGC          |
| PAK2 Fw       | CATCTTTAGCACTGGAGGCAAAGA         |
| PAK2 Rv       | ATGGTGTGCTCAAAATCAGATGG          |
| PAK3 Fw       | CAACCGGGATTCTTCAGCACT            |
| PAK3 Rv       | CACATGAATCGTATGCTCAAAGTCTG       |
| PAK4 Fw       | ATGTGGTGGAGATGTACAACAGCTA        |
| PAK4 Rv       | GTTTCATCCTGGTGTGGGTGAC           |
| PAK5 Fw       | GGCGTCCTCTTGTGTCTTC              |
| PAK5 Rv       | GTACTGAGTCCTTCTGATTTGC           |
| PAK6 Fw       | CCTAGCCCTAAGACCCGGG              |
| PAK6 Rv       | GCGGTCGGAAAGAGGAGTTG             |
| IPO8 Fw       | GCTCTGATAACTGTGCAG               |
| IPO8 Rv       | CAGTGTGTACACCTCCTG               |
| IPO8 Probe    | FAM-TGCTGTCCTCTGATCCTCGC-TAMRA   |

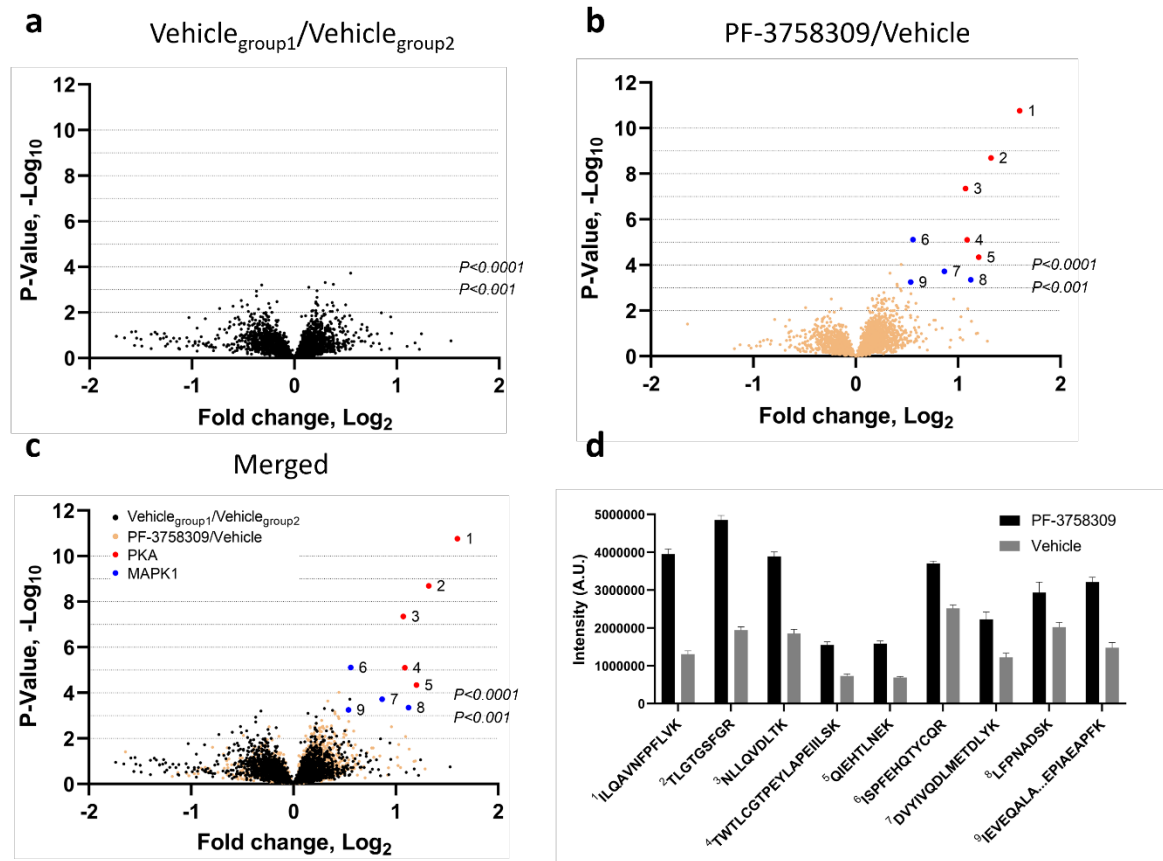

**Supplementary Figure 1: Drug/protein binding analysis of PF-3758309-treated peripheral blood mononuclear cells.** Volcano plots for (a) two identical vehicle groups (decoy comparison), (b) PF-3758309 and vehicle groups (experimental comparison), and (c) the decoy and experimental comparisons merged. The x-axis indicates the relative fold change ( $\log_2$ -transformed expression values of peptides in the absence or presence of PF-3758309) and the y-axis indicates the  $-\log_{10}$  of the p values. (d) Bar graph illustrating enrichment of PKA and MAPK1 peptides in PBMC lysates treated with PF-3758309. Bar graph data are shown as the mean  $\pm$  standard error.

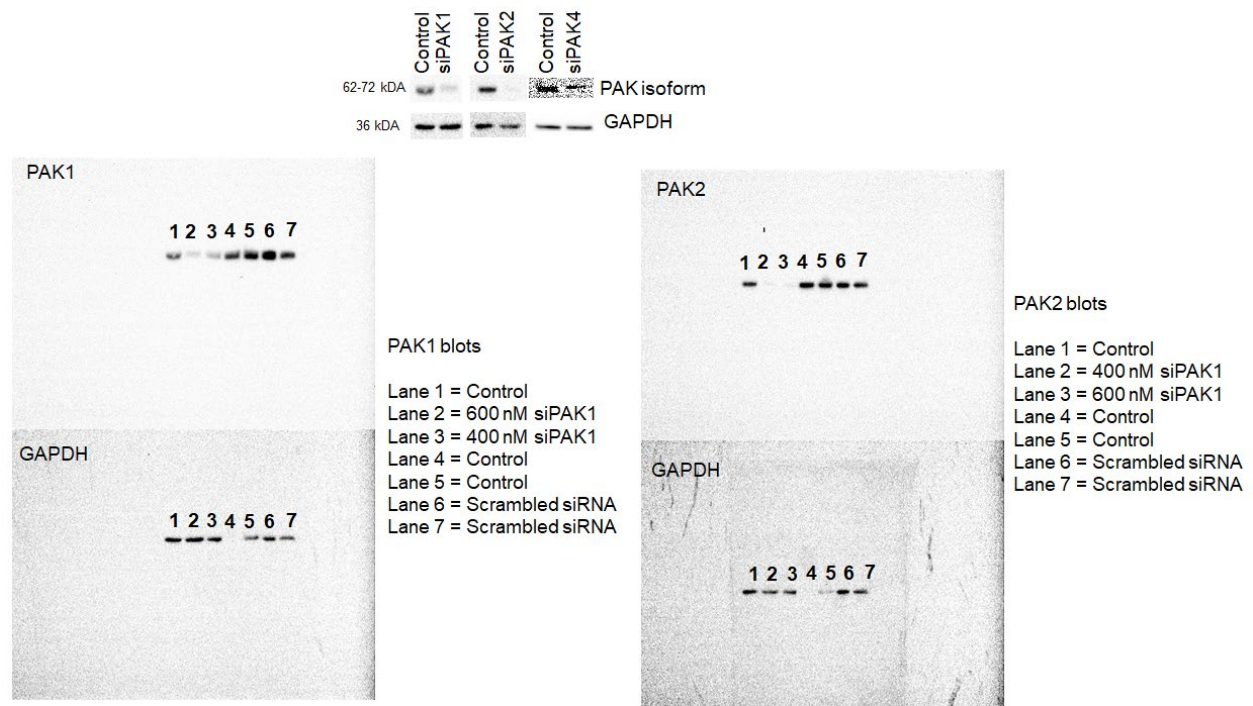

**Supplementary Figure 2: Original Western Blot for knockdown of PAK1 and PAK2 in 24ST1NLESG cells.**

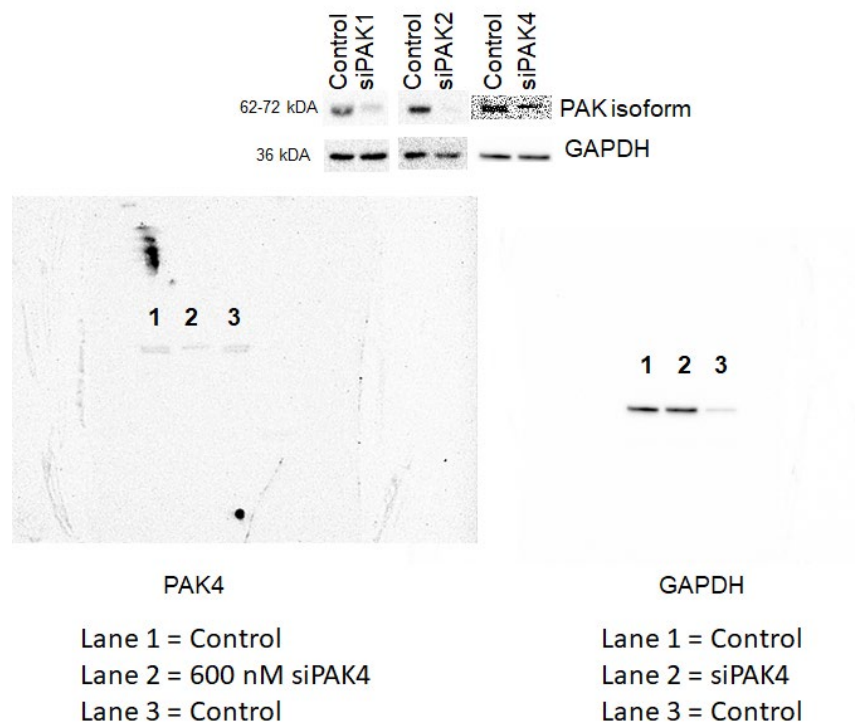

**Supplementary Figure 3: Original Western Blot for knockdown of PAK4 in 24ST1NLESG cells.**

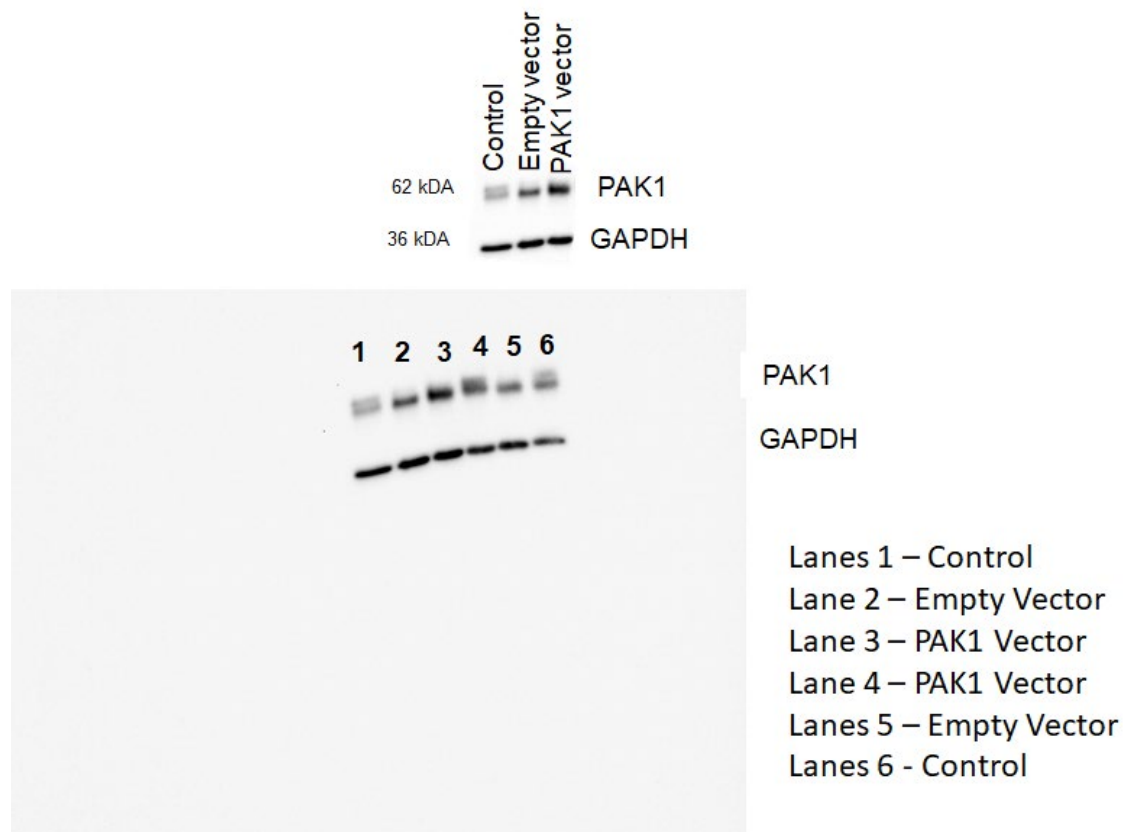

**Supplementary Figure 4: Original Western Blot for overexpression of PAK1 in 24ST1NLESG cells.**

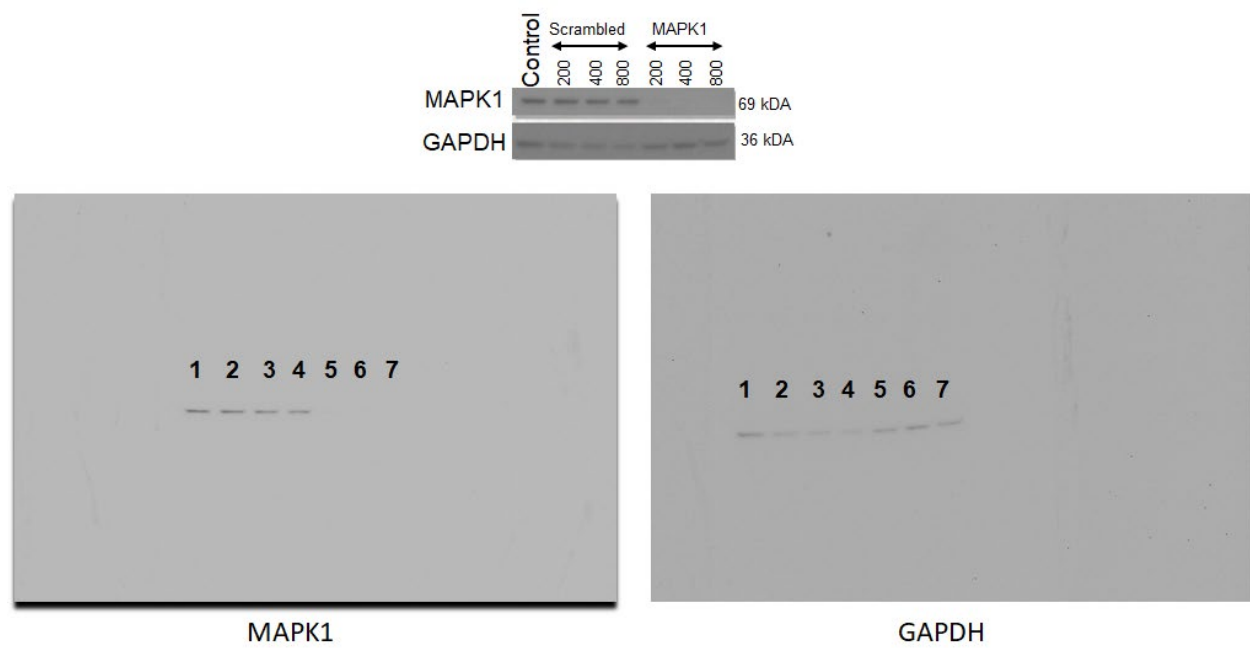

**Supplementary Figure 5: Original Western Blot for knockdown of MAPK1 in 24ST1NLESG cells.**

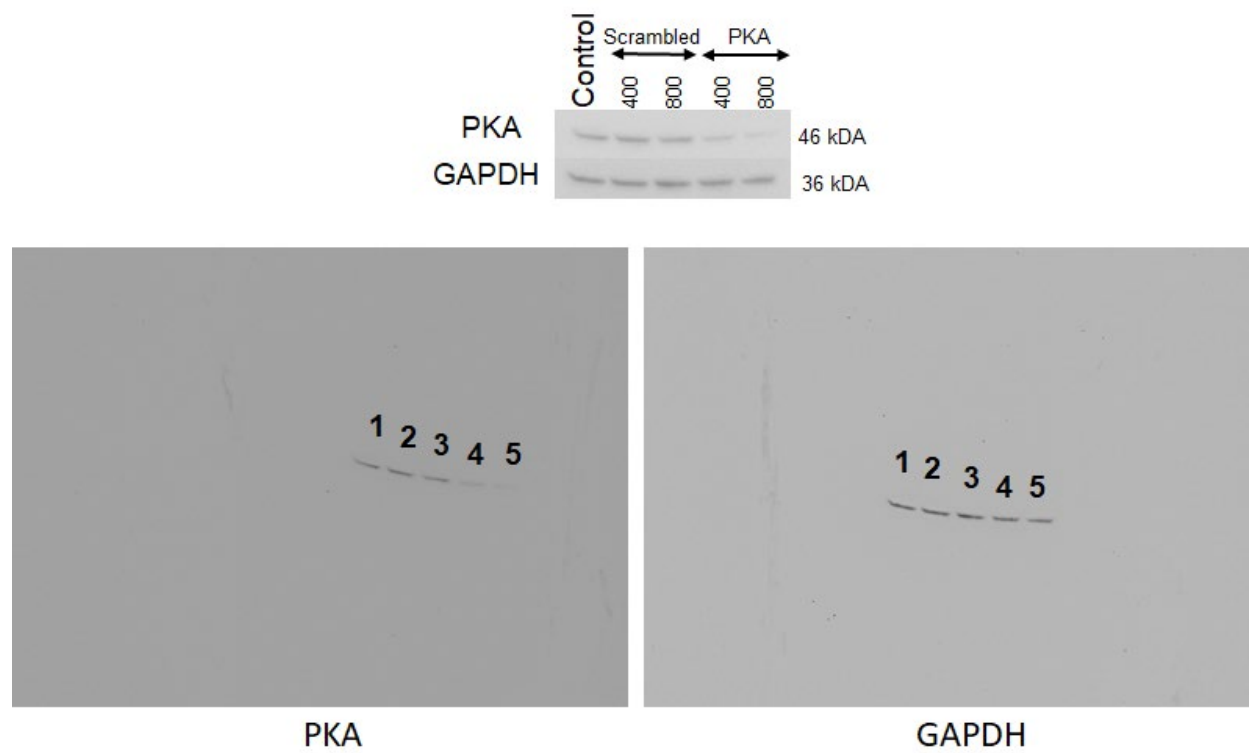

**Supplementary Figure 2: Original Western Blot for knockdown of PKA in 24ST1NLESG cells.**
